1 Title: Evaluation of immunological responses to third COVID-19 vaccine among people  
2 treated with sphingosine receptor-1 modulators and anti-CD20 therapy  
3

4 Authors: Ilana Katz Sand MD,<sup>1</sup> Sacha Gnjatic PhD<sup>2,3,4</sup>, Florian Krammer PhD<sup>4,5</sup>, Kevin  
5 Tuballes<sup>2</sup>, Juan Manuel Carreño<sup>5</sup>, Sammita Satyanarayan MD,<sup>1</sup> Susan Filomena BA,<sup>1</sup>  
6 Erin Staker BS,<sup>1</sup> Johnstone Tcheou<sup>5</sup>, Aaron Miller MD,<sup>1</sup> Michelle Fabian MD,<sup>1</sup> Neha Safi  
7 MD,<sup>1</sup> Jamie Nichols MD,<sup>1</sup> Jasmin Patel MD,<sup>1</sup> Stephen Krieger MD,<sup>1</sup> Stephanie Tankou  
8 MD, PhD,<sup>1</sup> Sam Horng MD, PhD,<sup>1</sup> Sylvia Klineova MD,<sup>1</sup> Erin Beck MD, PhD,<sup>1</sup> Miriam  
9 Merad MD, PhD,<sup>2,3</sup> Fred Lublin MD<sup>1</sup>

10  
11 Affiliations: 1. Corinne Goldsmith Dickinson Center for Multiple Sclerosis, Department of  
12 Neurology, Icahn School of Medicine at Mount Sinai, 2. Precision Immunology Institute,  
13 Human Immune Monitoring Center, 3. Department of Oncological Sciences, Icahn School  
14 of Medicine at Mount Sinai, New York, NY 10029, 4. Department of Pathology, Icahn  
15 School of Medicine at Mount Sinai, New York, NY 10029. 5. Department of Microbiology,  
16 Icahn School of Medicine at Mount Sinai, New York, NY, USA; Center for Vaccine  
17 Research and Pandemic Preparedness (C-VARPP), Icahn School of Medicine at Mount  
18 Sinai, New York, NY, USA,  
19

20 **Corresponding Author:**

21 Ilana Katz Sand, MD  
22 Corinne Goldsmith Dickinson Center for Multiple Sclerosis  
23 5 E. 98<sup>th</sup> Street  
24 Suite 1138  
25 New York, NY 10029  
26 [ilana.katzsand@mssm.edu](mailto:ilana.katzsand@mssm.edu)  
27 212-241-6854  
28  
29  
30

31 **Abstract**

32

33 **Importance:** People living with multiple sclerosis (MS) and other disorders treated with  
34 immunomodulatory therapies remain concerned about suboptimal responses to  
35 coronavirus disease 2019 (COVID-19) vaccines. Important questions persist regarding  
36 immunological response to third vaccines, particularly with respect to newer virus  
37 variants.

38 **Objective:** Evaluate humoral and cellular immune responses to third COVID-19 vaccine  
39 dose in people on anti-CD20 therapy and sphingosine 1-phosphate receptor (S1PR)  
40 modulators, including Omicron-specific assays.

41 **Design:** Observational study evaluating immunological response to third COVID-19  
42 vaccine dose in volunteers treated with anti-CD20 agents, S1PR modulators, and healthy  
43 controls. Neutralizing antibodies against USA-WA1/2020 (WA1) and B.1.1.529 (BA.1)  
44 severe acute respiratory syndrome coronavirus 2 (SARS-CoV-2) were measured before  
45 and after third vaccine. Cellular responses to spike peptide pools generated from WA1  
46 and BA.1 were evaluated.

47 **Setting:** Mount Sinai Hospital

48 **Participants:** People treated with anti-CD20 therapy or S1PR modulators and healthy  
49 volunteers

50 **Exposure:** Treatment with anti-CD20 therapy, S1PR modulator, or neither

51 **Main outcomes and measures:** Serum neutralizing antibodies and *ex vivo* T cell  
52 responses against SARS-CoV-2 antigens.

53 **Results:** This cohort includes 25 participants on anti-CD20 therapy, 12 on S1PR  
54 modulators, and 14 healthy controls. Among those on anti-CD20 therapy, neutralizing  
55 antibodies to WA1 were significantly reduced compared to healthy controls (ID50% GM  
56 post-vaccination of  $8.1 \pm 2.8$  in anti-CD20 therapy group vs  $452.6 \pm 8.442$  healthy  
57 controls,  $P < 0.0001$ ) and neutralizing antibodies to BA.1 were below the threshold of  
58 detection nearly universally. However, cellular responses, including to Omicron-specific  
59 peptides, were not significantly different from controls. Among those on S1PR  
60 modulators, neutralizing antibodies to WA1 were detected in a minority, and only 3/12  
61 had neutralizing antibodies just at the limit of detection to BA.1. Cellular responses to  
62 Spike antigen in those on S1PR modulators were reduced by a factor of 100 compared  
63 to controls (median 0.0008% vs. 0.08%,  $p < 0.001$ ) and were not significantly “boosted” by  
64 a third injection.

65 **Conclusions and Relevance:** Participants on immunomodulators had impaired antibody  
66 neutralization capacity, particularly to BA.1, even after a third vaccine. T cell responses  
67 were not affected by anti-CD20 therapies, but were nearly abrogated by S1PR  
68 modulators. These results have clinical implications warranting further study.

69

70

71 Manuscript Text

72 **Introduction**

73 Many people receiving treatment with immunomodulatory therapies, including those living  
74 with multiple sclerosis (MS), remain apprehensive about COVID-19 risk.

75 Among common therapies for MS, there is high concern with anti-CD20 agents and  
76 sphingosine 1-phosphate receptor (S1PR) modulators. Anti-CD20 agents deplete  
77 circulating B cells and, to a lesser extent, subsets of CD4 and CD8 cells expressing low  
78 levels of CD20.<sup>1</sup> In addition to widespread use in MS, anti-CD20 agents are utilized to  
79 treat B cell malignancies and a range of immune-mediated neurological and  
80 rheumatologic disorders.<sup>2</sup> S1PR modulators functionally block S1PR function,  
81 sequestering lymphocytes in the lymph nodes and thymus.<sup>3</sup> In addition to use in MS, the  
82 S1PR modulator ozanimod was recently approved for ulcerative colitis and ponesimod is  
83 currently in late stage clinical trials for psoriasis and graft-vs.-host disease.

84  
85 Previous data suggest reduced humoral response to the primary vaccine series related  
86 to these treatments<sup>4-6</sup>. Limited evidence suggests preserved cellular response to  
87 vaccination with anti-CD20 therapies and reduced response with S1PR modulators.<sup>7, 8</sup>  
88 Epidemiologic studies have suggested worse clinical outcomes with these therapies.<sup>9</sup>

89  
90 Here we address the most recent significant questions regarding the production of  
91 neutralizing antibodies and cellular immune responses before and after third COVID-19  
92 vaccinations in people treated with these immunomodulatory therapies, importantly  
93 accounting for the recent Omicron variant.

94

95 **Methods**

96 *Sample*

97 All participants were recruited between Mount Sinai's MS Center and Human Immune  
98 Monitoring Center. Eligible participants began treatment with B cell or S1P modulator  
99 therapy at least 60 days prior to third vaccine or were healthy volunteers. For this analysis,  
100 we included all enrollees who had completed baseline sampling prior to a third injection  
101 and a follow-up sample approximately 4 weeks after the third vaccination by early January  
102 2022.

103

104 *Assessing Humoral and Cellular Immunity*

105 Microneutralization assays against USA-WA1/2020 (WA1, or wild-type) and B.1.1.529  
106 (BA.1, or Omicron variant) SARS-CoV-2 were performed at the Icahn School of Medicine  
107 as previously described.<sup>10</sup> Groups were compared by one-way ANOVA with Tukey  
108 multiple comparisons. T cell responses were assessed by IFN-gamma ELISPOT using  
109 400,000 peripheral blood mononuclear cells pulsed with various antigens (15-mer  
110 overlapping peptide pool covering the entire sequence of Spike antigen (both WT and  
111 Omicron variants, from Miltenyi Biotec), N & Orf antigens (Bhardwaj, GenScript), long  
112 peptides covering the Spike RBD domain (Biosynthesis), recombinant Spike protein (gift  
113 from Drs. Herrera and Garforth, Einstein College of Medicine), and control viral peptide  
114 pools, DMSO, and PMA+ionomycine, as described.<sup>11</sup> Responses were considered  
115 positive if >20 spots were detected and at least 2x more than the number of spots to

116 DMSO. Pre-post comparisons were made by Wilcoxon paired t-tests, inter-cohort  
117 comparisons by Mann-Whitney t-test.

118

## 119 **Results**

120 **Table 1** describes 25 participants on B cell therapy, 12 on S1PR modulators, and 14  
121 controls.

122

123 **Figure 1** illustrates neutralizing antibody titers. Few on B-cell therapies mounted  
124 detectable neutralizing antibodies to WA1 (n=4, 2 just above the limit of detection (LoD)),  
125 with some increasing after the third vaccination (n=7, 4 just above the LoD). None had  
126 detectable neutralizing antibodies to BA.1 before the third vaccination, and only one  
127 converted after third vaccination. Among patients on S1PR modulators, three participants  
128 had neutralizing antibodies to BA.1 just at the level of detection post third injection. This  
129 contrasts with healthy controls, where a third vaccination resulted in detectable  
130 neutralizing antibodies to WA1 (ID50% GM of  $59.25 \pm 6.536$  pre- vs  $452.6 \pm 8.442$  post-  
131 vaccination,  $P < 0.01$ ) and BA.1 (ID50% GM of  $6.13 \pm 1.418$  pre- vs  $75.71 \pm 3.405$  post-  
132 vaccination,  $P < 0.0001$ ) nearly universally.

133

134 **Figure 2** demonstrates the cellular response to spike peptide pools generated from WA1  
135 **(A)** and BA.1 **(B)** SARS-CoV-2. Although there was more variability among those on B  
136 cell therapies compared to controls, overall T cell responses were not significantly  
137 different between B cell participants and controls. B cell participants showed significantly  
138 increased responses to WA1 and BA.1 peptides after a third injection (median 0.04%  
139 increase,  $p = 0.008$  by Wilcoxon paired test). Responses to WT Spike peptide pool were  
140 significantly greater in controls and B cell participants compared to S1PR participants  
141 (median 300-450 spots vs. 3 spots out of 400,000 PBMC,  $p < 0.0001$ ). Among S1PR  
142 participants, responses were not significantly different before and after third injection  
143 (median 0.004% increase). These results were confirmed with the Omicron peptide pool,  
144 RBD peptide pool, and Spike full-length protein, though these were generally less reactive  
145 in controls as well. Responses to the peptide pool generated from nucleocapsid (N) and  
146 open reading frame (ORF) proteins, which reflect naturally occurring immunity rather than  
147 vaccine-induced immunity, were not significantly different in MS participants compared to  
148 controls. Interestingly, responses to CEFT (cytomegalovirus, Epstein-Barr virus, influenza  
149 A virus, *Clostridium tetani*) peptide pools were significantly lower in B cell participants'  
150 responses compared to controls.

151

## 152 **Discussion**

153 Participants on both therapies demonstrated significantly reduced production of  
154 neutralizing antibodies, particularly to BA.1, as compared to controls. Cellular immune  
155 responses to vaccination were similar among those on B cell therapies to controls and  
156 increased after a third vaccination. However, S1P participants demonstrated less robust  
157 cellular responses. Driving the lack of significant increase among S1P participants is that  
158 there were very few “converts” after the third vaccination. The cellular response  
159 increased with a third vaccination among those who had a measurable response to their  
160 first two injections, but did not increase for patients who never responded to the first two

161 injections. This observation has significant consequences for expected responses to  
162 additional vaccines among those on S1PR modulators.

163  
164 Timing of therapy initiation may play a role in vaccine response. The lone B cell participant  
165 with a high level of neutralizing antibodies to BA.1 after the third vaccination received the  
166 first vaccinations prior to starting therapy, though notably two others who started therapy  
167 after the first vaccinations did not develop neutralizing antibodies to BA.1 after the third  
168 vaccine. Of three S1P participants with neutralizing antibodies to BA.1 just at LOD, two  
169 received their first injections prior to starting therapy. These are important preliminary  
170 observations that will be relevant to those with new diagnoses or needing to change  
171 therapy going forward.

172  
173 Strengths of our study include the presence of a control group and the study of S1PR  
174 modulators in addition to B cell therapy. We have assessed the levels of neutralizing  
175 antibodies, which reflect the effectiveness of the humoral immune response and  
176 represent a mechanistic correlate of protection against SARS-CoV-2,<sup>12, 13</sup> and measured  
177 cellular immunity. We have also studied Omicron-specific assays, which more accurately  
178 reflect the current circulating strains.

179  
180 Our study is limited by its small size. The cohort includes only one participant over age  
181 65 because of the timing of enrollment (many of those over 65 had already received a  
182 third vaccine when enrollment began). We did not quantify the relative contribution of CD8  
183 vs. CD4 T cell responses, though target antigen formulations used in our assays suggest  
184 that the third dose is better at increasing CD8 than CD4 T cells.<sup>14</sup> Study design did not  
185 permit correlation to clinical outcomes.

186  
187 Future directions include assessing durability of vaccine responses over time, studying  
188 the impact of natural infection with new variants, and most importantly, correlation with  
189 clinical outcomes. For those on S1PR modulators, future studies could consider brief  
190 cessation of therapy to aim for an improved response to additional injection, weighing  
191 potential benefits and risks of such a strategy.

192  
193  
194  
195 **Acknowledgments:** The authors would like to thank the Fishman family for generously  
196 supporting this work, as well our patients at the CGD MS Center who graciously donated  
197 their time and samples to participate in this study.

198  
199 SG was partially supported by NIH grants and contracts CA224319, DK124165,  
200 75N91020R00055, CA263705, and CA196521.

201  
202 Work in the Krammer laboratory was partially funded by the NIAID Collaborative Influenza  
203 Vaccine Innovation Centers (CIVIC) contract 75N93019C00051, the Centers of  
204 Excellence for Influenza Research and Surveillance (CEIRS, contract #  
205 HHSN272201400008C) and the Serological Sciences Network (SeroNet) in part with  
206 Federal funds from the National Cancer Institute, National Institutes of Health, under



207 Contract No. 75N91019D00024, Task Order No. 75N91020F00003. The content of this  
208 publication does not necessarily reflect the views or policies of the Department of Health  
209 and Human Services, nor does mention of trade names, commercial products or  
210 organizations imply endorsement by the U.S. Government.

211  
212 **Disclosures:**

213 SG reports past consultancy or advisory roles for Merck and OncoMed; research funding  
214 from Boehringer Ingelheim, Bristol Myers Squibb, Celgene, Genentech, EMD Serono,  
215 Pfizer, Regeneron Pharmaceuticals, and Takeda, all unrelated to the current work.

216  
217 The Icahn School of Medicine at Mount Sinai has filed patent applications relating to  
218 SARS-CoV-2 serological assays and NDV-based SARS-CoV-2 vaccines which list  
219 Florian Krammer as co-inventor. Mount Sinai has spun out a company, Kantaro, to market  
220 serological tests for SARS-CoV-2. Florian Krammer has consulted for Merck and Pfizer  
221 (before 2020), and is currently consulting for Pfizer, Seqirus, 3rd Rock Ventures and  
222 Avimex. The Krammer laboratory is also collaborating with Pfizer on animal models of  
223 SARS-CoV-2.

224  
225 **References**

- 226 1. Bar-Or A, O'Brien SM, Sweeney ML, Fox EJ, Cohen JA. Clinical Perspectives on the Molecular and  
227 Pharmacological Attributes of Anti-CD20 Therapies for Multiple Sclerosis. *CNS Drugs*. Sep  
228 2021;35(9):985-997. doi:10.1007/s40263-021-00843-8
- 229 2. Lee DSW, Rojas OL, Gommerman JL. B cell depletion therapies in autoimmune disease: advances  
230 and mechanistic insights. *Nat Rev Drug Discov*. Mar 2021;20(3):179-199. doi:10.1038/s41573-020-  
231 00092-2
- 232 3. McGinley MP, Cohen JA. Sphingosine 1-phosphate receptor modulators in multiple sclerosis and  
233 other conditions. *Lancet*. Sep 25 2021;398(10306):1184-1194. doi:10.1016/s0140-6736(21)00244-0
- 234 4. Satyanarayan S, Safi N, Sorets T, et al. Differential antibody response to COVID-19 vaccines  
235 across immunomodulatory therapies for multiple sclerosis. *Multiple Sclerosis and Related Disorders*.  
236 doi:10.1016/j.msard.2022.103737
- 237 5. Tallantyre EC, Vickaryous N, Anderson V, et al. COVID-19 Vaccine Response in People with  
238 Multiple Sclerosis. *Ann Neurol*. Jan 2022;91(1):89-100. doi:10.1002/ana.26251
- 239 6. Sormani MP, Inglese M, Schiavetti I, et al. Effect of SARS-CoV-2 mRNA vaccination in MS patients  
240 treated with disease modifying therapies. *EBioMedicine*. Oct 2021;72:103581.  
241 doi:10.1016/j.ebiom.2021.103581
- 242 7. Gadani SP, Reyes-Mantilla M, Jank L, et al. Discordant humoral and T cell immune responses to  
243 SARS-CoV-2 vaccination in people with multiple sclerosis on anti-CD20 therapy. *EBioMedicine*. Nov  
244 2021;73:103636. doi:10.1016/j.ebiom.2021.103636
- 245 8. Apostolidis SA, Kakara M, Painter MM, et al. Cellular and humoral immune responses following  
246 SARS-CoV-2 mRNA vaccination in patients with multiple sclerosis on anti-CD20 therapy. *Nat Med*. Nov  
247 2021;27(11):1990-2001. doi:10.1038/s41591-021-01507-2
- 248 9. Sormani MP, Schiavetti I, Carmisciano L, et al. COVID-19 Severity in Multiple Sclerosis: Putting  
249 Data Into Context. *Neurol Neuroimmunol Neuroinflamm*. Jan  
250 2022;9(1)doi:10.1212/nxi.0000000000001105
- 251 10. Carreño JM, Alshammary H, Tcheou J, et al. Activity of convalescent and vaccine serum against  
252 SARS-CoV-2 Omicron. *Nature*. 2022/02/01 2022;602(7898):682-688. doi:10.1038/s41586-022-04399-5

- 253 11. Sabbatini P, Tsuji T, Ferran L, et al. Phase I trial of overlapping long peptides from a tumor self-  
254 antigen and poly-ICLC shows rapid induction of integrated immune response in ovarian cancer patients.  
255 *Clin Cancer Res.* Dec 1 2012;18(23):6497-508. doi:10.1158/1078-0432.Ccr-12-2189  
256 12. Khoury DS, Cromer D, Reynaldi A, et al. Neutralizing antibody levels are highly predictive of  
257 immune protection from symptomatic SARS-CoV-2 infection. *Nature Medicine.* 2021/07/01  
258 2021;27(7):1205-1211. doi:10.1038/s41591-021-01377-8  
259 13. Gilbert PB, Montefiori DC, McDermott AB, et al. Immune correlates analysis of the mRNA-1273  
260 COVID-19 vaccine efficacy clinical trial. *Science.* 2022;375(6576):43-50.  
261 doi:doi:10.1126/science.abm3425  
262 14. Gnjjatic S, Atanackovic D, Matsuo M, et al. Cross-presentation of HLA class I epitopes from  
263 exogenous NY-ESO-1 polypeptides by nonprofessional APCs. *J Immunol.* Feb 1 2003;170(3):1191-6.  
264 doi:10.4049/jimmunol.170.3.1191

265  
266

| <b>Table 1 - Clinical Characteristics (n=51)</b> |                                                |                |                |                 |
|--------------------------------------------------|------------------------------------------------|----------------|----------------|-----------------|
|                                                  |                                                | Control (n=14) | S1P (n=12)     | Bcell (n=25)    |
| <b>Age (years), median (range)</b>               |                                                | 31 (24-61)     | 42 (31-69)     | 49 (26-65)      |
| <b>Sex</b>                                       |                                                |                |                |                 |
|                                                  | Male, n (% total)                              | 9 (64%)        | 7 (58%)        | 12 (48%)        |
|                                                  | Female, n (% total)                            | 5 (36%)        | 5 (42%)        | 13 (52%)        |
| <b>Race</b>                                      |                                                |                |                |                 |
|                                                  | White, n (% total)                             | 12 (85%)       | 11(92%)        | 22 (88%)        |
|                                                  | Black, n (% total)                             | 0(0%)          | 1 (8%)         | 0 (0%)          |
|                                                  | Asian, n (% total)                             | 1 (7%)         | 0 (0%)         | 2 (8%)          |
|                                                  | Biracial, n (% total)                          | 1 (7%)         | 0 (0%)         | 1 (4%)          |
| <b>Ethnicity</b>                                 |                                                |                |                |                 |
|                                                  | Hispanic, n (% total)                          | 2 (14%)        | 1 (8%)         | 2 (8%)          |
|                                                  | Non-Hispanic, n (% total)                      | 12 (86%)       | 11(92%)        | 23 (92%)        |
| <b>Disease Category</b>                          |                                                |                |                |                 |
|                                                  | none, n (% total)                              | 13(93%)        | 0 (0%)         | 0 (0%)          |
|                                                  | RRMS, n (% total)                              | 1 (7%)         | 11 (92%)       | 21 (84%)        |
|                                                  | SPMS, n (% total)                              | 0 (0%)         | 1 (8%)         | 1 (4%)          |
|                                                  | PPMS, n (% total)                              | 0 (0%)         | 0 (0%)         | 2 (8%)          |
|                                                  | MOG, n (% total)                               | 0 (0%)         | 0 (0%)         | 1 (4%)          |
| <b>Disease Modifying Therapy (DMT)</b>           |                                                |                |                |                 |
|                                                  | none, n (% total)                              | 13(93%)        | 0 (0%)         | 0 (0%)          |
|                                                  | teriflunomide, n (% total)                     | 1 (7%)         | 0 (0%)         | 0 (0%)          |
| <b>S1P Class</b>                                 |                                                |                |                |                 |
|                                                  | fingolimod, n (% total)                        | 0 (0%)         | 8 (67%)        | 0 (0%)          |
|                                                  | siponimod, n (% total)                         | 0 (0%)         | 2 (17%)        | 0 (0%)          |
|                                                  | ozanimod, n (% total)                          | 0 (0%)         | 2 (17%)        | 0 (0%)          |
| <b>Anti-CD20 Class</b>                           |                                                |                |                |                 |
|                                                  | rituximab, n (% total)                         | 0 (0%)         | 0 (0%)         | 2 (8%)          |
|                                                  | ocrelizumab, n (% total)                       | 0 (0%)         | 0 (0%)         | 22 (88%)        |
|                                                  | ofatumumab, n (% total)                        | 0 (0%)         | 0 (0%)         | 1 (4%)          |
| <b>DMT duration (days), median (range)</b>       |                                                | n/a*           | 1471 (69-3888) | 1185 (112-2629) |
| <b>Vaccine Type</b>                              |                                                |                |                |                 |
|                                                  | Pfizer, n (% total)                            | 11(79%)        | 5 (42%)        | 13 (52%)        |
|                                                  | Moderna, n (% total)                           | 3 (21%)        | 5 (42%)        | 12 (48%)        |
|                                                  | J&J, n (% total)                               | 0 (0%)         | 2 (16%)        | 0 (0%)          |
| <b>Vaccine Interval**</b>                        |                                                |                |                |                 |
|                                                  | days(median, range)                            | 279 (242-317)  | 183 (147-257)  | 207 (48-287)    |
| <b>Immunological Testing</b>                     |                                                |                |                |                 |
|                                                  | T0 (pre-booster), days- (median,range)         | 0 (0-7)        | 5 (0-21)       | 3 (0-21)        |
|                                                  | T4 (4 weeks post booster)- days (median,range) | 28 (26-45)     | 28 (23-37)     | 29 (22-39)      |
| <b>Covid-19 Infection History***</b>             |                                                |                |                |                 |
|                                                  | None, n (% total)                              | 11 (79%)       | 12 (100%)      | 19 (76%)        |
|                                                  | Suspected, n (% total)                         | 2 (14%)        | 0 (0%)         | 3 (12%)         |
|                                                  | Confirmed, n (% total)                         | 1 (7%)         | 0%             | 3 (12%)         |

\*DMT duration defined as time from DMT start to booster date for all patients. Of note, 1 control patient was on Aubagio (active comparator) and time from dmt start for that patient was 2694 days.

\*\* Vaccine interval is defined by the time between the 2nd vaccination and 3rd vaccination for patients receiving Pfizer or Moderna vaccines, and is defined by time between 1st vaccination and 2nd vaccination for patients receiving J&J.

\*\*\*Covid-19 Infection was defined as suspected or confirmed covid-19 prior to 3rd vaccination (or 2nd vaccination for patients with J&J). Controls (n=3), S1P (n=0), Anti-CD20 (n=6).

8



268 **Figure 1. Neutralizing antibodies. Neutralization expressed as the inhibitory dilution**  
 269 **50% ( $ID_{50}$ ) of sera against USA-WA1/2020 (WT, shown in A) and B.1.1.529 (Omicron,**  
 270 **shown in B) SARS-CoV-2 live viruses in the three groups: B cell, S1P, and healthy**  
 271 **controls. Group comparisons performed using a One-way ANOVA with Tukey multiple**  
 272 **comparisons; ns: not significant, \*  $p < 0.05$ , \*\*  $p < 0.01$ , \*\*\*  $p < 0.001$ , \*\*\*\*  $p < 0.0001$**   
 273

Figure 1

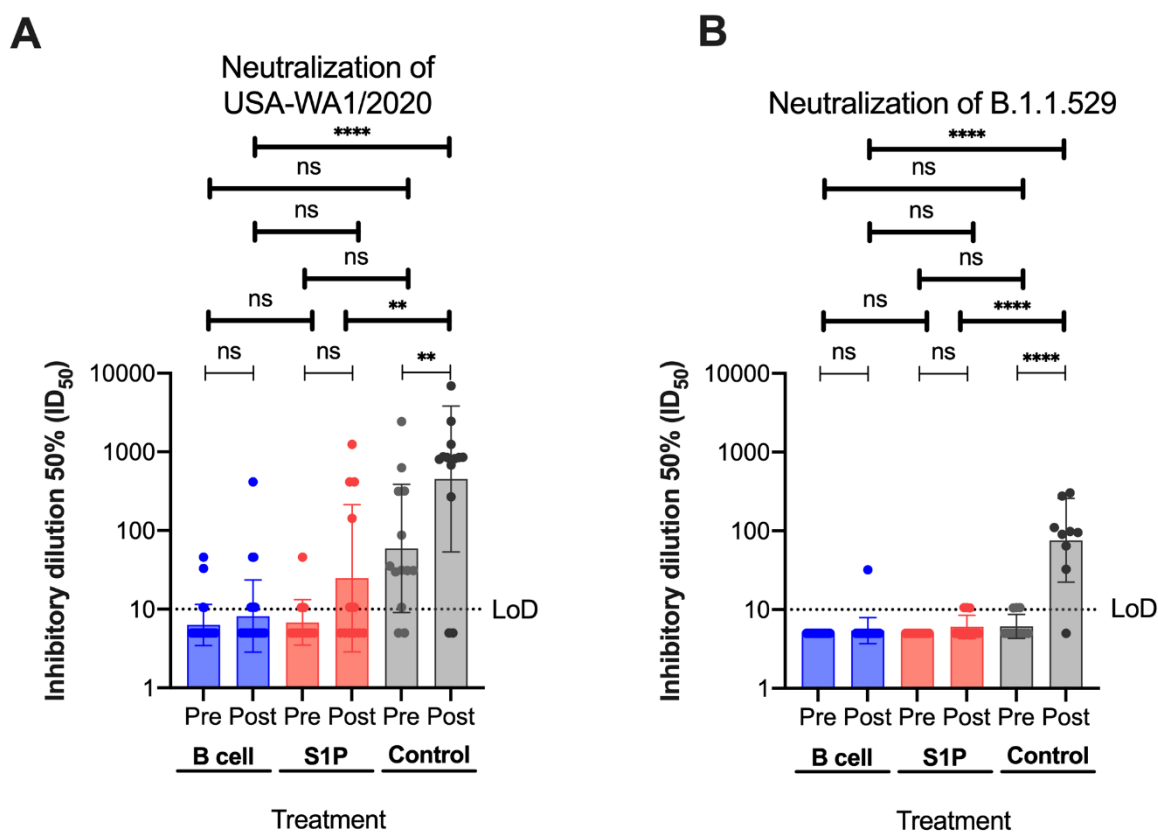

274  
 275  
 276  
 277  
 278  
 279  
 280  
 281  
 282  
 283  
 284  
 285  
 286  
 287  
 288  
 289

**Figure 2. Cellular response. Number of positive interferon ( $IFN$ )- $\gamma$  spots (log scale) out**  
 of 400,000 PBMC for the three groups: B cell, S1P, and healthy controls against the  
 indicated antigens: Spike WT peptide pool WA1 (A); Spike omicron variant peptide pool  
 (B); Spike full-length protein (C); long peptide pool covering Spike RBD domain (D);  
 positive control viral peptide pool CEFT [from CMV, EBV, influenza, and tetanus] (E);  
 SARS-CoV-2 N & Orf peptide pool (F); and assay control PMA/Ionomycin, out of 40,000  
 PBMCs (G). Intergroup comparisons by Mann-Whitney t-test in bold, pre-post  
 comparisons by Wilcoxon paired test; ns: not significant, \*  $p < 0.05$ , \*\*  $p < 0.01$ , \*\*\*  $p < 0.001$ ,  
 \*\*\*\*  $p < 0.0001$ .
